# Supplementary material for: Drug repurposing based on a quantum-inspired method versus classical fingerprinting uncovers potential antivirals against SARS-CoV-2
Source: PubMed Central journal article supplement (PMC9333455; doi:10.1371/journal.pcbi.1010330), 2022-07-18
Supplement: pcbi.1010330.s001.pdf [file pcbi.1010330.s001.pdf]

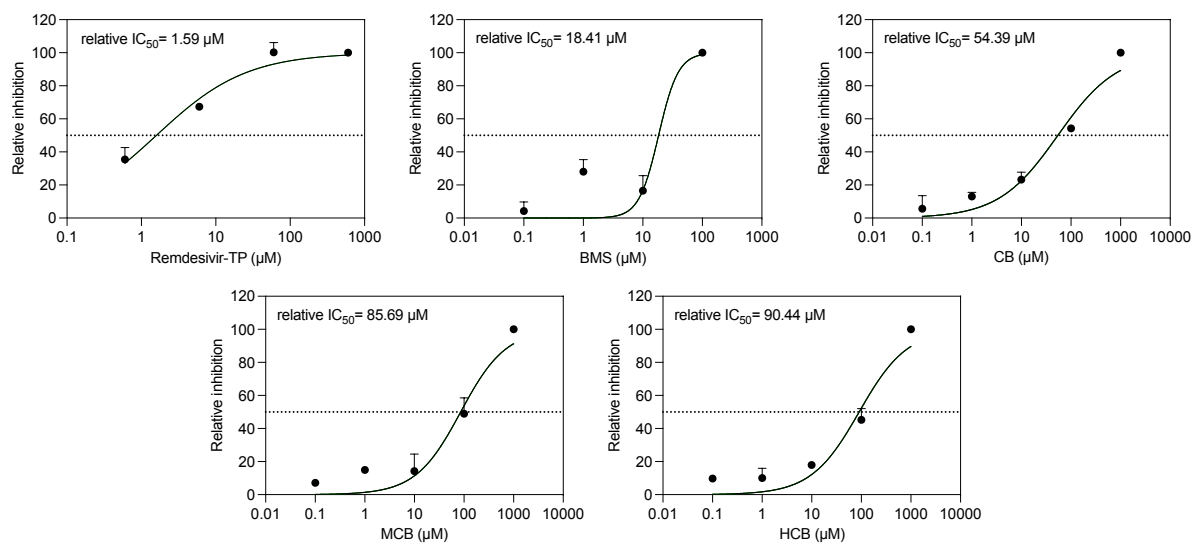

**S1 Fig. *In vitro* relative IC<sub>50</sub> of predicted compounds.** The relative IC<sub>50</sub> was calculated based on Fig 6 data as the concentration required to bring the curve down to the middle point between the top and bottom plateaus of the curve.
